# Supplementary material
Source: Research Square preprint supplement (doi:10.21203/rs.3.rs-8912940/v1)
Supplement: Supplementary file 1 [file 86b07976bb17a73347926a76.xlsx]

## Sheet: Sheet1
Results and Statistics
	mean (mm)	standard deviation (mm)	estimated marginal mean (mm)	Lower 95% CL (mm)	Upper 95% CL (mm)	p-value between groups	Shapiro-Wilk normality p-value
Astronaut
x-shift (Lateral +, Medial -)	0.34	0.27	0.38	0.21	0.50	0.013	0.62
y-shift (Anterior +, Posterior -)	0.73	0.4	0.77	0.61	0.89	<0.0001	0.44
z-shift (Superior +, Inferior -)	-0.21	0.35	-0.16	-0.33	-0.042	0.14	0.63
Control
x-shift (Lateral +, Medial -)	0.1	0.14	0.07	-0.034	0.24	0.013	0.62
y-shift (Anterior +, Posterior -)	0.12	0.33	0.092	-0.021	0.25	<0.0001	0.29
z-shift (Superior +, Inferior -)	-0.037	0.35	-0.052	-0.17	0.10	0.14	0.47
